# Supplementary material for: Effect and Biocompatibility of a Cross-Linked Hyaluronic Acid and Polylactide-co-glycolide Microcapsule Vehicle in Intratympanic Drug Delivery for Treating Acute Acoustic Trauma
Source: MDPI journal article supplement (doi:10.3390/ijms22115720), 2021-05-27
Supplement: s1 [file s1]

Supplementary Figure legends

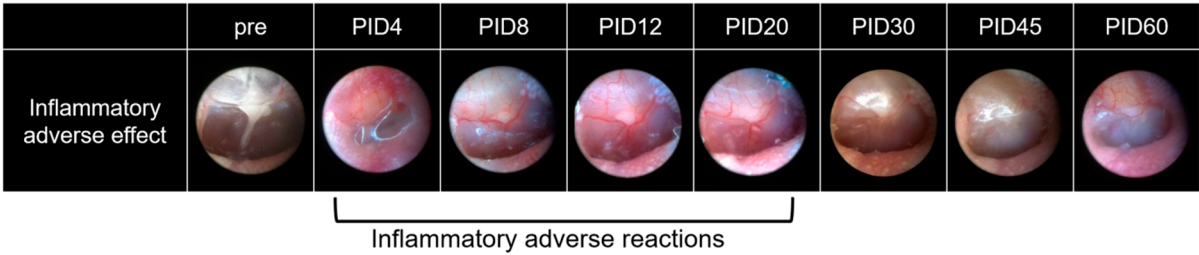

**Figure S1.** Typical endoscopy findings indicating inflammatory adverse reactions after dual-vehicle injection. Bulging of the pars flaccida and erythematous change of the tympanic membrane were identified between post-injection day (PID) 4 and 20, which slowly recovered after PID30.

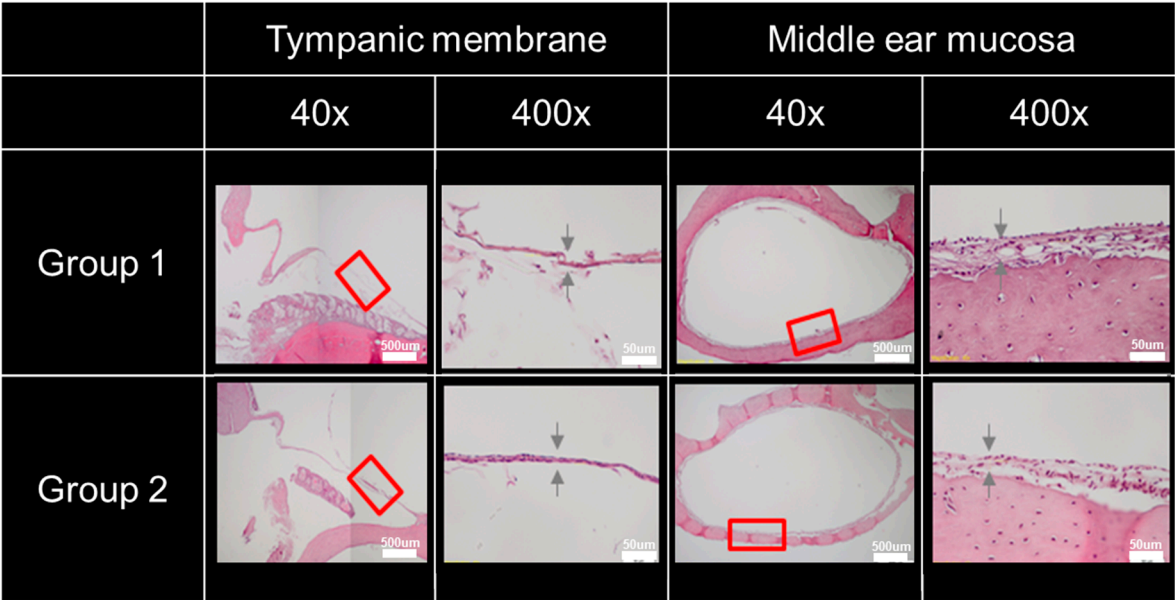

**Figure S2.** Histopathology of the tympanic membrane (TM) and middle ear mucosa. There were no differences in the TM and mucosa at the base of the bulla between groups 1 and 2. The thickness of the TM was  $12.4 \pm 14.9 \mu\text{m}$  in group 1 and  $13.3 \pm 12.8 \mu\text{m}$  in group 2. The thickness of the mucosa at the base of the bulla was  $22.3 \pm 7.3 \mu\text{m}$  in group 1 and  $24.0 \pm 16.0 \mu\text{m}$  in group 2.
